# Supplementary material for: Investigation of electrocatalytic oxygen evolution reaction (OER) selectivity against methanol oxidation on stainless steel
Source: Royal Society of Chemistry journal article supplement (doi:10.1039/d4cy00030g), 2024-01-01
Supplement: d4cy00030g1.pdf [file d4cy00030g1.pdf]

## Investigation of electrocatalytic oxygen evolution reaction (OER) selectivity against methanol oxidation on stainless steel

Dr. P. Esakki Karthik<sup>1\*</sup> Prof. Luigi Sangaletti<sup>2</sup>, Prof. Matteo Ferroni<sup>3,4,5</sup>,  
and Prof. Ivano Alessandri<sup>5,6,7</sup>

<sup>1</sup>*Research Institute for Sustainable Energy, TCG-CREST, Sector V, Salt Lake, Kolkata 700091*

<sup>2</sup>*I-LAMP and Department of Mathematics and Physics, Università Cattolica del Sacro Cuore, via della Garzetta 48, 25133 Brescia, Italy*

<sup>3</sup>*Department of Civil, Environmental, Architectural Engineering and Mathematics (DICATAM), Università degli Studi di Brescia, 25123 Brescia, Italy*

<sup>4</sup>*CNR-IMM Bologna, 40129 Bologna, Italy*

<sup>5</sup>*INO-CNR, 25123 Brescia, Italy*

<sup>6</sup>*INSTM, UdR of Brescia, 25123 Brescia, Italy*

<sup>7</sup>*Department of Information Engineering (DII) University of Brescia, 25123 Brescia, Italy*

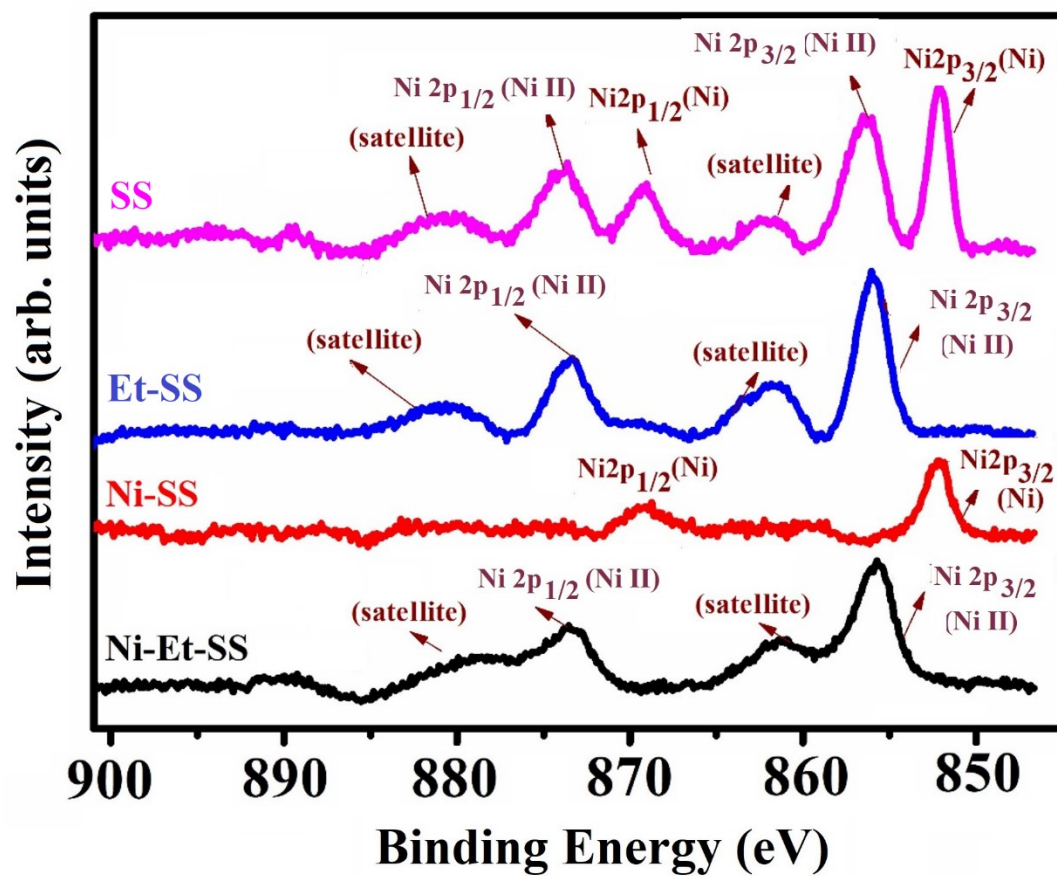

**Figure S1.** Ni XPS elemental scan on various substrates.

From top to bottom: SS, Et-SS, Ni-SS, and Ni-Et-SS

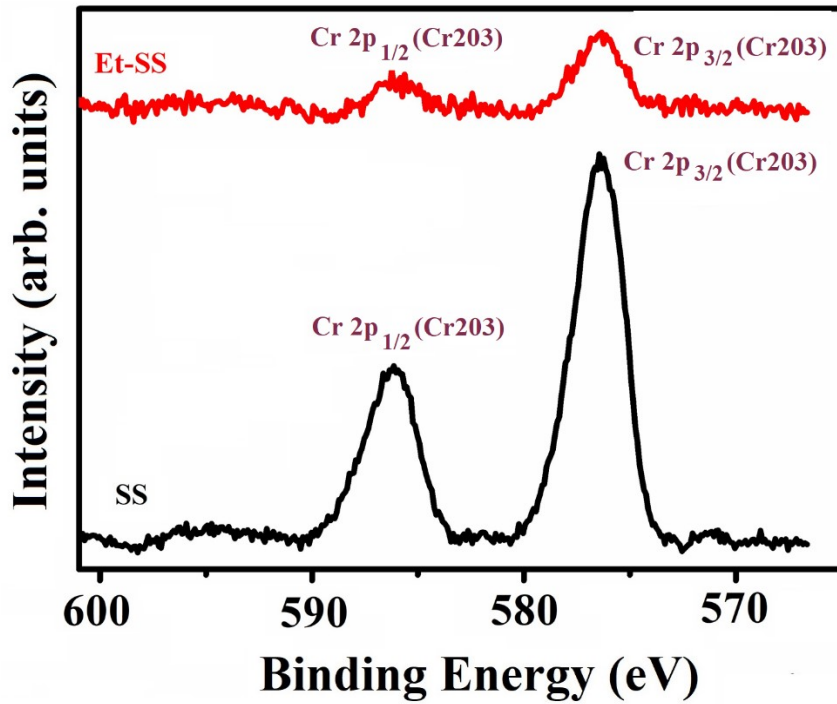

**Figure S2.** Cr 2p XPS scan of austenite steel before (SS) and after (Et-SS) electrochemical reaction.

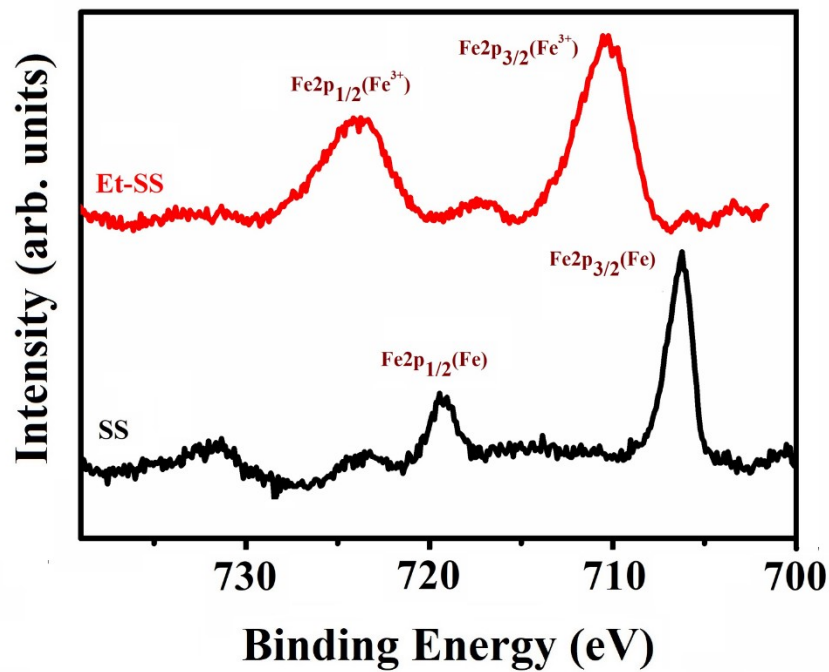

**Figure S3.** Fe 2p XPS scan of austenite steel before (SS) after (Et-SS) electrochemical reaction.

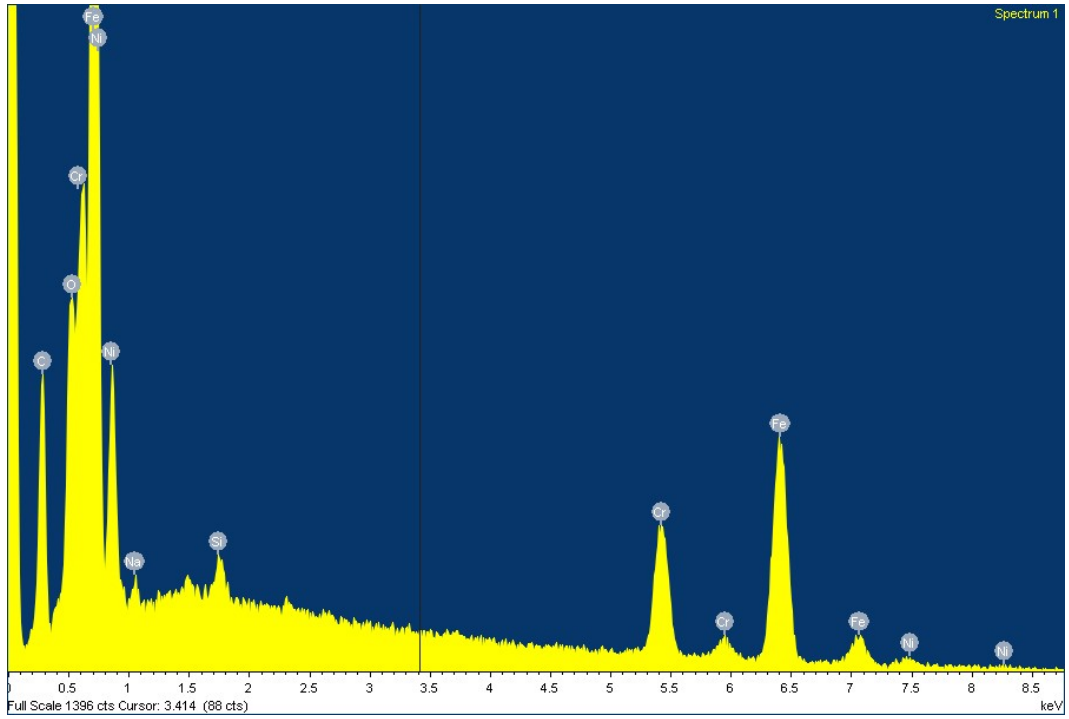

**Figure S4.** EDAX spectrum of austenite-SS.

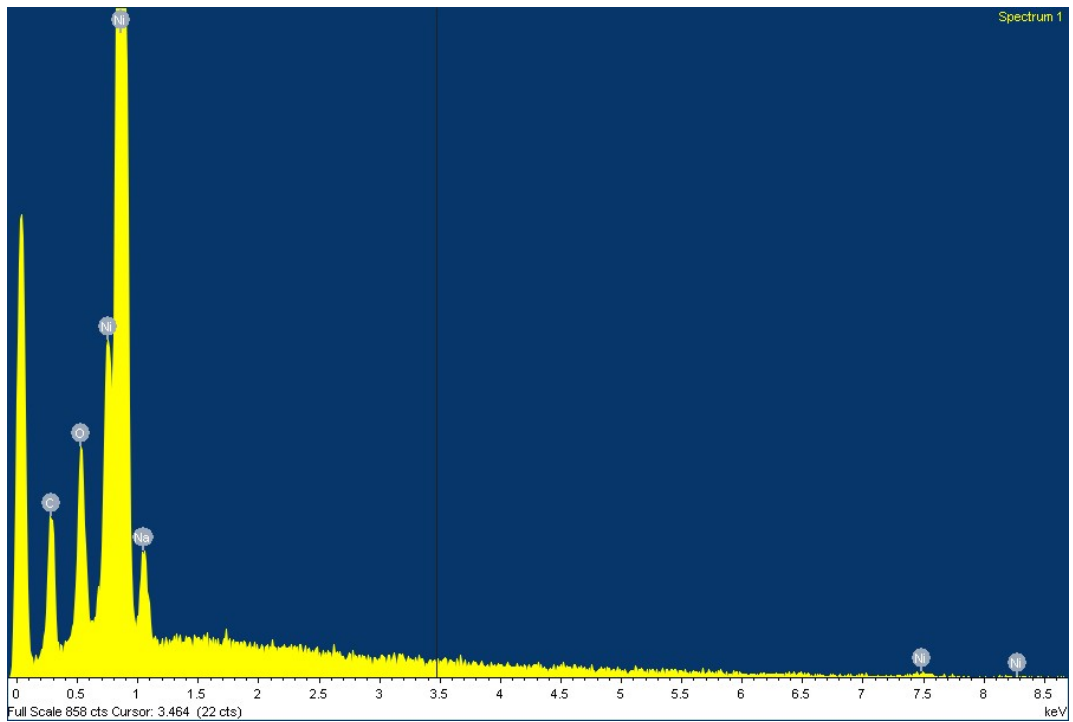

**Figure S5.** EDAX spectrum of nickel deposited austenite Ni-SS.

**Table S1. Elemental composition form EDAX spectrum of the samples**

| S.No. | Sample          | Elements (%) |    |    |
|-------|-----------------|--------------|----|----|
|       |                 | Fe           | Ni | Cr |
| 1.    | Pristine SS     | 35           | 30 | 24 |
| 2.    | Ni deposited SS | -            | 94 | -  |

Since the carbon and oxygen elements are present in both samples, the remaining percentage will be considered as carbon oxygen elements
